# Supplementary material for: FimH and Type 1 Pili Mediated Tumor Cell Cytotoxicity by Uropathogenic Escherichia coli In Vitro
Source: MDPI journal article supplement (doi:10.3390/pathogens12060751), 2023-05-23

**Figure S1.** Light microscopy images of *E. coli* UTI89 grown under static or shaking conditions, UTI89  $\Delta fim$ , UTI89  $\Delta fimH$  and UTI89  $\Delta fimH/pfimH$  incubated with canine blood with/without D-mannose (10× magnification).

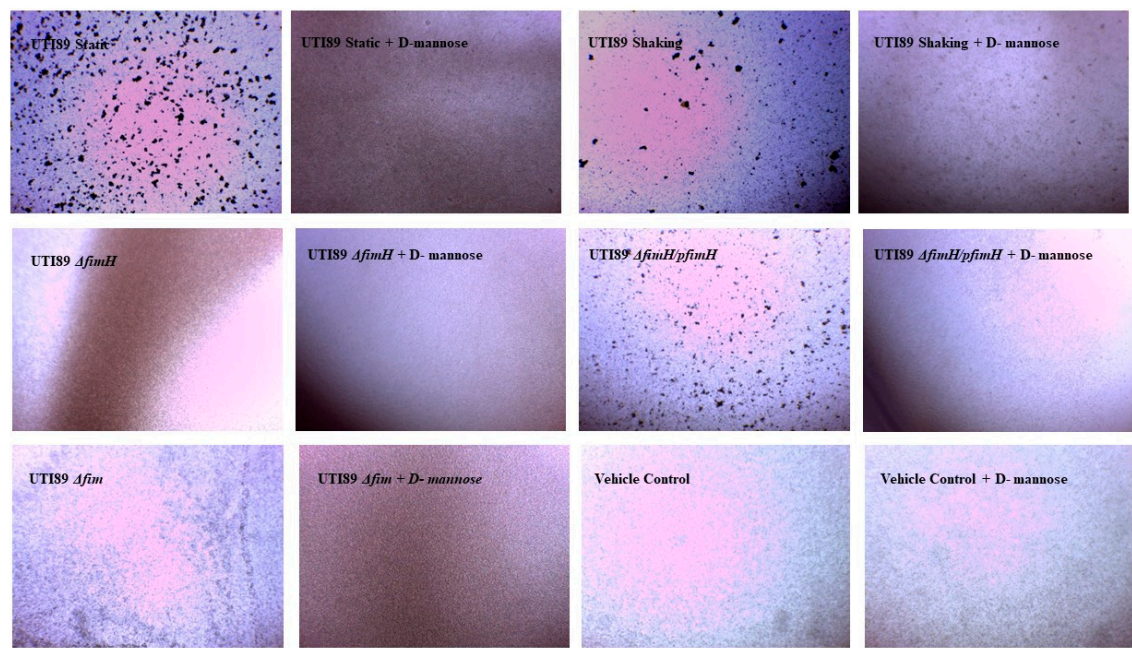

**Table S1.** Red Blood Cell Hemagglutination of various constructs of UTI89 with/without D-mannose.

|                                                                                                      | UTI89<br>Static | UTI89<br>Shaking | UTI89 $\Delta fimH$ | UTI89<br>$\Delta fimH/pfimH$ | UTI89<br>$\Delta fim$ |
|------------------------------------------------------------------------------------------------------|-----------------|------------------|---------------------|------------------------------|-----------------------|
| Mannose<br>(-)                                                                                       | +++             | +                | -                   | ++                           | -                     |
| Mannose<br>(+)                                                                                       | -               | -                | -                   | -                            | -                     |
| “-”: No agglutination “+”: Low agglutination “++”: Moderate agglutination “+++”: High agglutination. |                 |                  |                     |                              |                       |

**Figure S2.** Inverted light microscopy images revealed that UTI89 grown statically has increased interaction with both MDA-MB-231 and MCF-7 breast cancer cells compared to the UTI89 grown under shaking conditions ( $\times 20$  magnification; arrows point to the enlarged area).

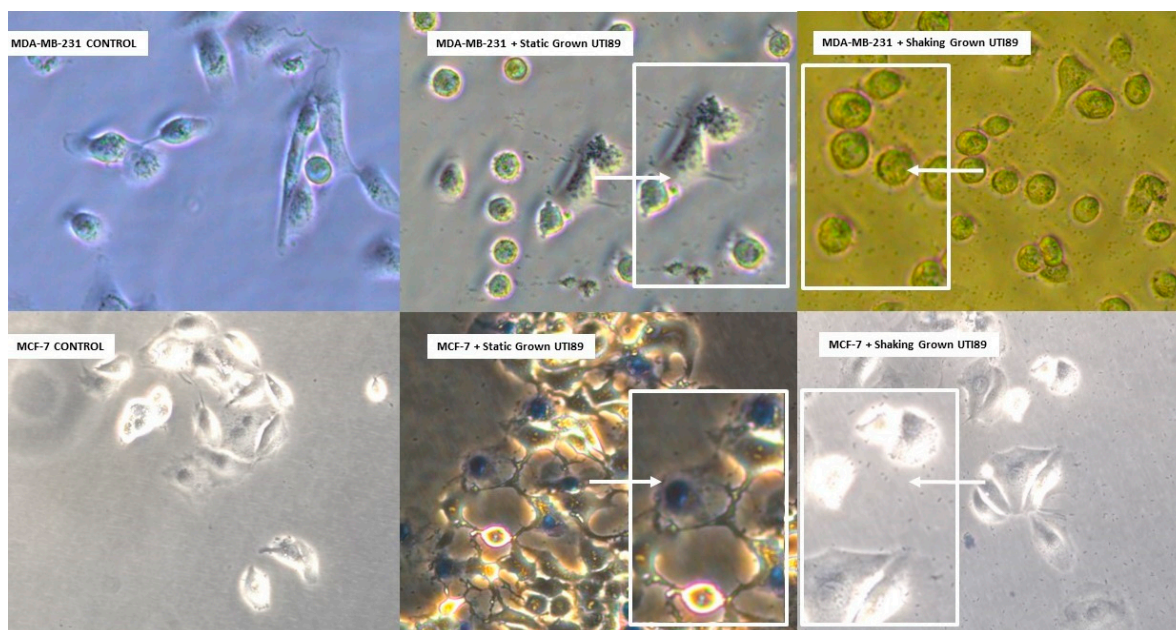

**Figure S3.** Inverted light microscopy images revealed significant cell surface area reduction in MDA-MB-231 cells upon incubation with both static and shaking UTI89 compared to MCF-7 breast cancer cells ( $\times 20$  magnification).

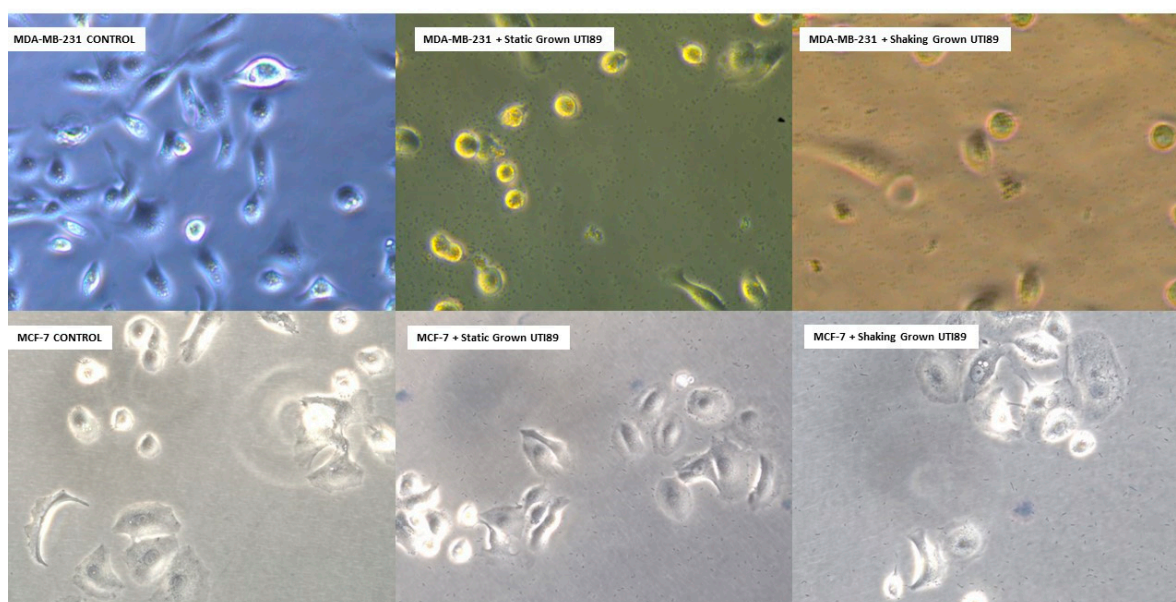

Supplement: s1 [file s1]
